# Supplementary material for: Identification of a novel reactive oxygen species (ROS)-related genes model combined with RT-qPCR experiments for prognosis and immunotherapy in gastric cancer
Source: Front Genet. 2023 Apr 14;14:1074900. doi: 10.3389/fgene.2023.1074900 (PMC10141461; doi:10.3389/fgene.2023.1074900)
Supplement: Supplementary file 2 [file DataSheet4.xlsx]

## Sheet: Data Sheet 4
ibrary(limma)
setwd("G:")
rt=read.table("symbol.txt", header=T, sep="\t", check.names=F)
rt=as.matrix(rt)
rownames(rt)=rt[,1]
exp=rt[,2:ncol(rt)]
dimnames=list(rownames(exp), colnames(exp))
data=matrix(as.numeric(as.matrix(exp)), nrow=nrow(exp), dimnames=dimnames)
data=avereps(data)
data=data[rowMeans(data)>0,]
gene=read.table("gene.txt", header=F, sep="\t", check.names=F)
sameGene=intersect(as.vector(gene[,1]), rownames(data))
geneExp=data[sameGene,]
out=rbind(ID=colnames(geneExp),geneExp)
write.table(out,file="tcga.pyroptosisExp.txt",sep="\t",quote=F,col.names=F)
library(limma)
library(pheatmap)
expFile="tcga.pyroptosisExp.txt"
setwd("G:")
rt=read.table(expFile, header=T, sep="\t", check.names=F)
rt=as.matrix(rt)
rownames(rt)=rt[,1]
exp=rt[,2:ncol(rt)]
dimnames=list(rownames(exp), colnames(exp))
data=matrix(as.numeric(as.matrix(exp)), nrow=nrow(exp), dimnames=dimnames)
data=avereps(data)
group=sapply(strsplit(colnames(data),"\\-"), "[", 4)
group=sapply(strsplit(group,""), "[", 1)
group=gsub("2", "1", group)
conNum=length(group[group==1])
treatNum=length(group[group==0])
sampleType=c(rep(1,conNum), rep(2,treatNum))
sigVec=c()
outTab=data.frame()
for(i in rownames(data)){
	if(sd(data[i,])<0.001){next}
	wilcoxTest=wilcox.test(data[i,] ~ sampleType)
	pvalue=wilcoxTest$p.value
	if(pvalue<0.05){
		Sig=ifelse(pvalue<0.001,"***",ifelse(pvalue<0.01,"**",ifelse(pvalue<0.05,"*","")))
		sigVec=c(sigVec, paste0(i, Sig))
		conGeneMeans=mean(data[i,1:conNum])
		treatGeneMeans=mean(data[i,(conNum+1):ncol(data)])
		logFC=log2(treatGeneMeans)-log2(conGeneMeans)
		outTab=rbind(outTab,cbind(gene=i,conMean=conGeneMeans,treatMean=treatGeneMeans,logFC=logFC,pValue=pvalue))
	}
}
write.table(outTab, file="diff.xls", sep="\t", row.names=F, quote=F)
write.table(outTab, file="diff.txt", sep="\t", row.names=F, quote=F)
exp=data[as.vector(outTab[,1]),]
expOut=rbind(ID=colnames(exp), exp)
write.table(expOut, file="diffGeneExp.txt", sep="\t", col.names=F, quote=F)
exp=log2(exp+0.1)
row.names(exp)=sigVec
Type=c(rep("Normal",conNum),rep("Tumor",treatNum))
names(Type)=colnames(data)
Type=as.data.frame(Type)
pdf(file="heatmap.pdf", width=9, height=8.5)
pheatmap(exp,
annotation=Type,
color = colorRampPalette(c(rep("blue",5), "white", rep("red",5)))(50),
cluster_cols =F,
cluster_rows =T,
scale="row",
show_colnames = F,
show_rownames = T,
fontsize = 8,
fontsize_row=8,
fontsize_col=8)
dev.off()
library(maftools)
setwd("G:")
geneRT=read.table("gene.txt", header=T, sep="\t", check.names=F, row.names=1)
gene=row.names(geneRT)
pdf(file="oncoplot.pdf", width=8, height=12)
maf=read.maf(maf="input.maf")
oncoplot(maf=maf, genes=gene, fontSize=0.5, draw_titv=T)
dev.off()
inputFile="cnvMatrix.txt"
setwd("G:")
rt=read.table(inputFile, header=T, sep="\t", check.names=F, row.names=1)
GAIN=rowSums(rt> 0)
LOSS=rowSums(rt< 0)
GAIN=GAIN/ncol(rt)*100
LOSS=LOSS/ncol(rt)*100
data=cbind(GAIN, LOSS)
data=data[order(data[,"GAIN"],decreasing = T),]
data.max = apply(data, 1, max)
pdf(file="CNVfreq.pdf", width=20, height=6)
cex=1.3
par(cex.lab=cex, cex.axis=cex, font.axis=2, las=1, xpd=T)
bar=barplot(data.max, col="grey80", border=NA,
xlab="", ylab="CNV.frequency(%)", space=1.5,
xaxt="n", ylim=c(0,1.2*max(data.max)))
points(bar,data[,"GAIN"], pch=20, col=2, cex=3)
points(bar,data[,"LOSS"], pch=20, col=3, cex=3)
legend("top", legend=c('GAIN','LOSS'), col=2:3, pch=20, bty="n", cex=2, ncol=2)
par(srt=45)
text(bar, par('usr')[3]-0.2, rownames(data), adj=1)
dev.off()
library("RCircos")
setwd("G:")
cytoBandIdeogram=read.table("refer.txt", header=T, sep="\t")
chr.exclude <- NULL
cyto.info <- cytoBandIdeogram
tracks.inside <- 5
tracks.outside <- 0
RCircos.Set.Core.Components(cyto.info, chr.exclude, tracks.inside, tracks.outside)
rcircos.params <- RCircos.Get.Plot.Parameters()
rcircos.params$text.size=1
rcircos.params$point.size=5
RCircos.Reset.Plot.Parameters(rcircos.params)
pdf(file="RCircos.pdf", width=8, height=8)
RCircos.Set.Plot.Area()
RCircos.Chromosome.Ideogram.Plot()
RCircos.Scatter.Data=read.table("Rcircos.scatter.txt", header=T, sep="\t", check.names=F)
data.col <- 4
track.num <- 1
side <- "in"
RCircos.Scatter.Plot(RCircos.Scatter.Data, data.col, track.num, side, by.fold=0.1)
RCircos.Gene.Label.Data=read.table("Rcircos.geneLabel.txt", header=T, sep="\t", check.names=F)
name.col <- 4
side <- "in"
track.num <- 2
RCircos.Gene.Connector.Plot(RCircos.Gene.Label.Data, track.num, side)
track.num <- 3
RCircos.Gene.Name.Plot(RCircos.Gene.Label.Data, name.col, track.num, side)
dev.off()
library(limma)
library(survival)
library(survminer)
expFile="prgGeneExp.txt"
cliFile="time.txt"
setwd("G:\\")
rt=read.table(expFile, header=T, sep="\t", check.names=F)
rt=as.matrix(rt)
rownames(rt)=rt[,1]
exp=rt[,2:ncol(rt)]
dimnames=list(rownames(exp), colnames(exp))
data=matrix(as.numeric(as.matrix(exp)), nrow=nrow(exp), dimnames=dimnames)
data=avereps(data)
data=data[rowMeans(data)>0,]
data=t(data)
rownames(data)=gsub("(.*?)\\_(.*?)", "\\2", rownames(data))
cli=read.table(cliFile, header=T, sep="\t", check.names=F, row.names=1)
cli$futime=cli$futime/365
sameSample=intersect(row.names(data), row.names(cli))
data=data[sameSample,]
cli=cli[sameSample,]
rt=cbind(cli, data)
outTab=data.frame()
km=c()
for(i in colnames(rt[,3:ncol(rt)])){
	cox <- coxph(Surv(futime, fustat) ~ rt[,i], data = rt)
	coxSummary = summary(cox)
	coxP=coxSummary$coefficients[,"Pr(>|z|)"]
	outTab=rbind(outTab,
			cbind(id=i,
			HR=coxSummary$conf.int[,"exp(coef)"],
			HR.95L=coxSummary$conf.int[,"lower .95"],
			HR.95H=coxSummary$conf.int[,"upper .95"],
			pvalue=coxSummary$coefficients[,"Pr(>|z|)"])
			)
	data=rt[,c("futime", "fustat", i)]
	colnames(data)=c("futime", "fustat", "gene")
	res.cut=surv_cutpoint(data, time = "futime", event = "fustat", variables =c("gene"))
	res.cat=surv_categorize(res.cut)
	fit=survfit(Surv(futime, fustat) ~gene, data = res.cat)
	#print(paste0(i, " ", res.cut$cutpoint[1]))
	diff=survdiff(Surv(futime, fustat) ~gene,data =res.cat)
	pValue=1-pchisq(diff$chisq, df=1)
	km=c(km, pValue)
	if(pValue<0.05){
		if(pValue<0.001){
			pValue="p<0.001"
		}else{
			pValue=paste0("p=",sprintf("%.03f",pValue))
		}
		surPlot=ggsurvplot(fit,
						data=res.cat,
						pval=pValue,
						pval.size=6,
						legend.title=i,
						legend.labs=c("high","low"),
						xlab="Time(years)",
						ylab="Overall survival",
						palette=c("red", "blue"),
						break.time.by=1,
						conf.int=F,
						risk.table=F,
						risk.table.title="",
						risk.table.height=.25)
		pdf(file=paste0("sur.", i, ".pdf"),onefile = FALSE,
			width = 5,
			height =4.5)
		print(surPlot)
		dev.off()
	}
}
outTab=cbind(outTab, km)
write.table(outTab,file="uniCox.txt",sep="\t",row.names=F,quote=F)
library(igraph)
library(psych)
library(reshape2)
library(RColorBrewer)
GeneExpfile <- "prgGeneExp.txt"
Genefile <- "gene.txt"
Coxfile <- "uniCox.txt"
setwd("G:\\")
gene.group <- read.table(Genefile,header=T,sep="\t")
gene.exp <- read.table(GeneExpfile,header=T,sep="\t",row.names=1)
gene.cox <- read.table(Coxfile,header=T,sep="\t")
colnames(gene.group) <- c('id','group')
genelist <- intersect(gene.group$id, gene.cox$id)
genelist <- intersect(genelist, rownames(gene.exp))
gene.group <- gene.group[match(genelist,gene.group$id),]
gene.group <- gene.group[order(gene.group$group),]
gene.exp <- gene.exp[match(gene.group$id,rownames(gene.exp)),]
gene.cox <- gene.cox[match(gene.group$id,gene.cox$id),]
gene.cor <- corr.test(t(gene.exp))
gene.cor.cor <- gene.cor$r
gene.cor.pvalue <- gene.cor$p
gene.cor.cor[upper.tri(gene.cor.cor)] = NA
gene.cor.pvalue[upper.tri(gene.cor.pvalue)] = NA
gene.cor.cor.melt <- melt(gene.cor.cor) #gene1 \t gene2 \t cor
gene.cor.pvalue.melt <- melt(gene.cor.pvalue)
gene.melt <- data.frame(from = gene.cor.cor.melt$Var2,to=gene.cor.cor.melt$Var1,cor=gene.cor.cor.melt$value,pvalue=gene.cor.pvalue.melt$value)
gene.melt <- gene.melt[gene.melt$from!=gene.melt$to&!is.na(gene.melt$pvalue),,drop=F]
gene.edge <- gene.melt[gene.melt$pvalue<0.0001,,drop=F]
gene.edge$color <- ifelse(gene.edge$cor>0,'pink','#6495ED')
gene.edge$weight <- abs(gene.edge$cor)*6
gene.node <- gene.group
group.color <- colorRampPalette(brewer.pal(9, "Set1"))(length(unique(gene.node$group)))
gene.node$color <- group.color[as.numeric(as.factor(gene.node$group))]
gene.node$shape <- "circle"
gene.node$frame <- ifelse(gene.cox$HR>1,'purple',"green")
gene.node$pvalue <- gene.cox$pvalue
# pvalue size
pvalue.breaks <- c(0,0.0001,0.001,0.01,0.05,1)
pvalue.size <- c(16,14,12,10,8)
cutpvalue <- cut(gene.node$pvalue,breaks=pvalue.breaks)
gene.node$size <- pvalue.size[as.numeric(cutpvalue)]
nodefile <- "network.node.txt"
edgefile <- "network.edge.txt"
write.table(gene.node, nodefile, sep="\t", col.names=T, row.names=F, quote=F)
write.table(gene.edge, edgefile, sep="\t", col.names=T, row.names=F, quote=F)
node = read.table(nodefile, header=T, sep="\t", comment.char="")
edge = read.table(edgefile, header=T, sep="\t", comment.char="")
g = graph.data.frame(edge,directed = FALSE)
node = node[match(names(components(g)$membership),node$id),]
if(!is.na(match('color',colnames(node)))) V(g)$color = node$color
if(!is.na(match('size',colnames(node)))) V(g)$size = node$size
if(!is.na(match('shape',colnames(node)))) V(g)$shape = node$shape
if(!is.na(match('frame',colnames(node)))) V(g)$frame = node$frame
pdf(file="network.pdf", width=40, height=32)
par(mar=c(0,0,0,0))
layout(matrix(c(1,1,4,2,3,4),nc=2),height=c(4,4,2),width=c(8,3))
coord = layout_in_circle(g)
degree.x = acos(coord[,1])
degree.y = asin(coord[,2])
degree.alpha = c()
for(i in 1:length(degree.x)){
	if(degree.y[i]<0) degree.alpha=c(degree.alpha,2*pi-degree.x[i]) else degree.alpha=c(degree.alpha,degree.x[i])
}
degree.cut.group = (0:8)/4*pi
degree.cut.group[1] = -0.0001
degree.cut = cut(degree.alpha,degree.cut.group)
degree.degree = c(-pi/4,-pi/4,-pi/2,-pi/2,pi/2,pi/2,pi/2,pi/4)
degree = degree.degree[as.numeric(degree.cut)]
values <- lapply(node$id,function(x)c(1,1))
V(g)$pie.color = lapply(1:nrow(node),function(x)c(node$color[x],node$frame[x]))
V(g)$frame = NA
plot(g,layout=layout_in_circle,vertex.shape="pie",vertex.pie=values,
	vertex.label.cex=V(g)$lable.cex,edge.width = E(g)$weight,edge.arrow.size=0,
	vertex.label.color=V(g)$color,vertex.frame.color=V(g)$frame,edge.color=E(g)$color,
	vertex.label.cex=2,vertex.label.font=2,vertex.size=V(g)$size,edge.curved=0.4,
	vertex.color=V(g)$color,vertex.label.dist=1,vertex.label.degree=degree)
# label.degree : zero means to the right; and pi means to the left; up is -pi/2 and down is pi/2; The default value is -pi/4
# label.dist If it is 0 then the label is centered on the vertex; If it is 1 then the label is displayed beside the vertex.
par(mar=c(0,0,0,0))
plot(1,type="n",xlab="",ylab="",axes=F)
groupinfo = unique(data.frame(group=node$group,color=node$color))
legend("left",legend=groupinfo$group,col=groupinfo$color,pch=16,bty="n",cex=3)
par(mar=c(0,0,0,0))
plot(1,type="n",xlab="",ylab="",axes=F)
legend("left",legend=c('Risk factors','Favorable factors'),col=c('purple','green'),pch=16,bty="n",cex=2.5)
par(mar=c(0,0,0,0))
plot(1,type="n",xlab="",axes=F,ylab="")
legend("top",legend=c('Postive correlation with P<0.0001','Negative correlation with P<0.0001'),lty=1,lwd=4,col=c('pink','#6495ED'),bty="n",cex=2.2)
legend('bottom',legend=c(0.0001,0.001,0.01,0.05,1),pch=16,pt.cex=c(1.6,1.4,1.2,1,0.8)*6,bty="n",ncol=5,cex=2.2,col="black",title="Cox test, pvalue")
dev.off()
library(limma)
library(survival)
library(ConsensusClusterPlus)
expFile="tcga.pyroptosisExp.txt"
cliFile="time.txt"
workDir="G:\\"
setwd(workDir)
data=read.table(expFile, header=T, sep="\t", check.names=F, row.names=1)
group=sapply(strsplit(colnames(data),"\\-"), "[", 4)
group=sapply(strsplit(group,""), "[", 1)
group=gsub("2", "1", group)
data=data[,group==0]
data=t(data)
rownames(data)=gsub("(.*?)\\-(.*?)\\-(.*?)\\-.*", "\\1\\-\\2\\-\\3", rownames(data))
data=avereps(data)
data=log2(data+1)
cli=read.table(cliFile,sep="\t",check.names=F,header=T,row.names=1)
sameSample=intersect(row.names(data),row.names(cli))
data=data[sameSample,]
cli=cli[sameSample,]
rt=cbind(cli,data)
sigGenes=c()
for(i in colnames(rt)[3:ncol(rt)]){
	cox=coxph(Surv(futime, fustat) ~ rt[,i], data = rt)
	coxSummary=summary(cox)
	coxP=coxSummary$coefficients[,"Pr(>|z|)"]
	if(coxP<0.05){ sigGenes=c(sigGenes,i) }
}
maxK=9
data=t(data[,sigGenes])
results=ConsensusClusterPlus(data,
maxK=maxK,
reps=50,
pItem=0.8,
pFeature=1,
title=workDir,
clusterAlg="pam",
distance="euclidean",
seed=123456,
plot="png")
clusterNum=2
Cluster=results[[clusterNum]][["consensusClass"]]
Cluster=as.data.frame(Cluster)
Cluster[,1]=paste0("C", Cluster[,1])
ClusterOut=rbind(ID=colnames(Cluster), Cluster)
write.table(ClusterOut, file="cluster.txt", sep="\t", quote=F, col.names=F)
library(survival)
library(survminer)
ClusterFile="cluster.txt"
cliFile="time.txt"
setwd("G:\\")
Cluster=read.table(ClusterFile, header=T, sep="\t", check.names=F, row.names=1)
cli=read.table(cliFile, header=T, sep="\t", check.names=F, row.names=1)
colnames(cli)=c("futime", "fustat")
cli$futime=cli$futime/365
sameSample=intersect(row.names(Cluster), row.names(cli))
rt=cbind(cli[sameSample,,drop=F], Cluster[sameSample,,drop=F])
length=length(levels(factor(rt$Cluster)))
diff=survdiff(Surv(futime, fustat) ~ Cluster, data = rt)
pValue=1-pchisq(diff$chisq, df=length-1)
if(pValue<0.001){
	pValue="p<0.001"
}else{
	pValue=paste0("p=",sprintf("%.03f",pValue))
}
fit <- survfit(Surv(futime, fustat) ~ Cluster, data = rt)
#print(surv_median(fit))
bioCol=c("#0066FF","#FF9900","#FF0000","#6E568C","#7CC767","#223D6C","#D20A13","#FFD121","#088247","#11AA4D")
bioCol=bioCol[1:length]
surPlot=ggsurvplot(fit,
		data=rt,
		conf.int=F,
		pval=pValue,
		pval.size=6,
		legend.title="Cluster",
		legend.labs=levels(factor(rt[,"Cluster"])),
		legend = c(0.8, 0.8),
		font.legend=10,
		xlab="Time(years)",
		break.time.by = 1,
		palette = bioCol,
		surv.median.line = "hv",
		risk.table=T,
		cumevents=F,
		risk.table.height=.25)
pdf(file="survival.pdf",onefile = FALSE,width=7,height=5.5)
print(surPlot)
dev.off()
library(limma)
library(ggpubr)
cluFile="cluster.txt"
immFile="MCPcounter.result.txt"
setwd("G:\\")
immune=read.table(immFile, header=T, sep="\t", check.names=F, row.names=1)
immune=as.matrix(immune)
immune=t(immune)
cluster=read.table(cluFile, header=T, sep="\t", check.names=F, row.names=1)
sameSample=intersect(row.names(immune), row.names(cluster))
immune1=immune[sameSample,,drop=F]
cluster1=cluster[sameSample,,drop=F]
data=cbind(immune1, cluster1)
type=levels(factor(data[,"Cluster"]))
data$Cluster=factor(data$Cluster, levels=type)
comp=combn(type, 2)
my_comparisons=list()
for(i in 1:ncol(comp)){my_comparisons[[i]]<-comp[,i]}
bioCol=c("#0066FF","#FF0000","#FF9900","#6E568C","#7CC767","#223D6C","#D20A13","#FFD121","#088247","#11AA4D")
bioCol=bioCol[1:8]
for(i in colnames(data)[1:(ncol(data)-1)]){
	data[,i][data[,i]>quantile(data[,i],0.99)]=quantile(data[,i],0.99)
	violin=ggviolin(data, x="Cluster", y=i, fill = "Cluster",
	xlab="", ylab=i,
	legend.title="Cluster",
	palette=bioCol,
	pval=pValue,
		pval.size=6,
	add = "boxplot", add.params = list(fill="white"))+
	stat_compare_means(comparisons = my_comparisons)
	#stat_compare_means(comparisons = my_comparisons,symnum.args=list(cutpoints = c(0, 0.001, 0.01, 0.05, 1), symbols = c("***", "**", "*", "ns")),label = "p.signif")
	pdf(file=paste0("violin.", i, ".pdf"), width=5, height=4.5)
	print(violin)
	dev.off()
}
library(limma)
library(pheatmap)
expFile="diffGeneExp.txt"
ClusterFile="cluster.txt"
cliFile="clinical.txt"
setwd("G:\\")
exp=read.table(expFile, header=T, sep="\t", check.names=F, row.names=1)
Cluster=read.table(ClusterFile, header=T, sep="\t", check.names=F, row.names=1)
cli=read.table(cliFile, header=T, sep="\t", check.names=F, row.names=1)
samSample=intersect(row.names(Cluster), row.names(cli))
cli=cli[samSample,,drop=F]
Cluster=Cluster[samSample,,drop=F]
Type=cbind(Cluster, cli)
Type=Type[order(Type$Cluster),,drop=F]
exp=exp[,row.names(Type)]
sigVec=c("Cluster")
for(clinical in colnames(Type[,2:ncol(Type)])){
	data=Type[c("Cluster", clinical)]
	colnames(data)=c("Cluster", "clinical")
	data=data[(data[,"clinical"]!="unknow"),]
	tableStat=table(data)
	stat=chisq.test(tableStat)
	pvalue=stat$p.value
	Sig=ifelse(pvalue<0.001,"***",ifelse(pvalue<0.01,"**",ifelse(pvalue<0.05,"*","")))
	sigVec=c(sigVec, paste0(clinical, Sig))
}
colnames(Type)=sigVec
colorList=list()
#Type=Type[apply(Type,1,function(x)any(is.na(match('unknow',x)))),,drop=F]
bioCol=c("#0066FF","#FF0000","#ed1299", "#0dbc21", "#246b93", "#cc8e12", "#d561dd",
"#6ad157", "#f7aa5d", "#9ed84e", "#39ba30", "#373bbf", "#a1ce4c", "#ef3bb6", "#d66551",
"#1a918f", "#ddd53e", "#ff66fc", "#2927c4", "#57e559" ,"#8e3af4" ,"#f9a270" ,"#22547f", "#db5e92",
"#4aef7b", "#e86502", "#99db27", "#e07233", "#8249aa","#cebb10", "#03827f", "#931635", "#ff523f",
"#edd05e", "#6f25e8", "#0dbc21", "#167275", "#280f7a", "#6373ed", "#5b910f" ,"#7b34c1" ,"#0cf29a" ,"#d80fc1",
"#dd27ce", "#07a301", "#391c82", "#2baeb5","#925bea", "#09f9f5", "#63ff4f")
j=0
for(cli in colnames(Type[,1:ncol(Type)])){
	cliLength=length(levels(factor(Type[,cli])))
	cliCol=bioCol[(j+1):(j+cliLength)]
	j=j+cliLength
	names(cliCol)=levels(factor(Type[,cli]))
	if("unknow" %in% levels(factor(Type[,cli]))){
		cliCol["unknow"]="grey75"}
	colorList[[cli]]=cliCol
}
pdf("heatmap.pdf", width=8.5, height=6)
exp=log2(exp+0.01)
pheatmap(exp,
annotation=Type,
annotation_colors = colorList,
color = colorRampPalette(c(rep("blue",5), "white", rep("red",5)))(100),
cluster_cols =F,
cluster_rows =F,
scale="row",
show_colnames=F,
show_rownames=T,
fontsize=6,
fontsize_row=1,
fontsize_col=6)
dev.off()
library(limma)
library(sva)
tcgaExpFile="symbol.txt"
geoExpFile="geoMatrix.txt"
geneFile="diff.txt"
setwd("G:\\")
rt=read.table(tcgaExpFile, header=T, sep="\t", check.names=F)
rt=as.matrix(rt)
rownames(rt)=rt[,1]
exp=rt[,2:ncol(rt)]
dimnames=list(rownames(exp),colnames(exp))
tcga=matrix(as.numeric(as.matrix(exp)),nrow=nrow(exp),dimnames=dimnames)
tcga=avereps(tcga)
tcga=log2(tcga+1)
group=sapply(strsplit(colnames(tcga),"\\-"), "[", 4)
group=sapply(strsplit(group,""), "[", 1)
group=gsub("2", "1", group)
tcga=tcga[,group==0]
tcga=t(tcga)
rownames(tcga)=gsub("(.*?)\\-(.*?)\\-(.*?)\\-.*", "\\1\\-\\2\\-\\3", rownames(tcga))
tcga=t(avereps(tcga))
rt=read.table(geoExpFile, header=T, sep="\t", check.names=F)
rt=as.matrix(rt)
rownames(rt)=rt[,1]
exp=rt[,2:ncol(rt)]
dimnames=list(rownames(exp),colnames(exp))
geo=matrix(as.numeric(as.matrix(exp)),nrow=nrow(exp),dimnames=dimnames)
geo=avereps(geo)
qx=as.numeric(quantile(geo, c(0, 0.25, 0.5, 0.75, 0.99, 1.0), na.rm=T))
LogC=( (qx[5]>100) || ( (qx[6]-qx[1])>50 && qx[2]>0) )
if(LogC){
geo[geo<0]=0
geo=log2(geo+1)}
geo=normalizeBetweenArrays(geo)
sameGene=intersect(row.names(tcga),row.names(geo))
tcgaOut=tcga[sameGene,]
geoOut=geo[sameGene,]
all=cbind(tcgaOut,geoOut)
batchType=c(rep(1,ncol(tcgaOut)),rep(2,ncol(geoOut)))
outTab=ComBat(all, batchType, par.prior=TRUE)
tcgaOut=outTab[,colnames(tcgaOut)]
tcgaOut[tcgaOut<0]=0
geoOut=outTab[,colnames(geoOut)]
geoOut[geoOut<0]=0
tcgaTab=rbind(ID=colnames(tcgaOut), tcgaOut)
write.table(tcgaTab, file="TCGA.normalize.txt", sep="\t", quote=F, col.names=F)
geoTab=rbind(ID=colnames(geoOut), geoOut)
write.table(geoTab,file="GEO.normalize.txt",sep="\t",quote=F,col.names=F)
gene=read.table(geneFile, header=T, sep="\t", check.names=F)
sameGene=intersect(as.vector(gene[,1]), rownames(tcgaOut))
tcgaShareExp=tcgaOut[sameGene,]
geoShareExp=geoOut[sameGene,]
tcgaShareExp=rbind(ID=colnames(tcgaShareExp),tcgaShareExp)
write.table(tcgaShareExp,file="TCGA.share.txt",sep="\t",quote=F,col.names=F)
geoShareExp=rbind(ID=colnames(geoShareExp),geoShareExp)
write.table(geoShareExp,file="GEO.share.txt",sep="\t",quote=F,col.names=F)
library(limma)
expFile="tcga.share.txt"
cliFile="time.txt"
setwd("G:\\")
rt=read.table(expFile, header=T, sep="\t", check.names=F)
rt=as.matrix(rt)
rownames(rt)=rt[,1]
exp=rt[,2:ncol(rt)]
dimnames=list(rownames(exp),colnames(exp))
data=matrix(as.numeric(as.matrix(exp)),nrow=nrow(exp),dimnames=dimnames)
data=avereps(data)
data=data[rowMeans(data)>0,]
data=t(data)
cli=read.table(cliFile,sep="\t",check.names=F,header=T,row.names=1)
sameSample=intersect(row.names(data),row.names(cli))
data=data[sameSample,]
cli=cli[sameSample,]
out=cbind(cli,data)
out=cbind(id=row.names(out),out)
write.table(out,file="tcga.expTime.txt",sep="\t",row.names=F,quote=F)
library(survival)
coxPfilter=0.05
inputFile="tcga.expTime.txt"
setwd("")
rt=read.table(inputFile, header=T, sep="\t", check.names=F, row.names=1)
rt$futime=rt$futime/365
outTab=data.frame()
sigGenes=c("futime","fustat")
for(i in colnames(rt[,3:ncol(rt)])){
	cox <- coxph(Surv(futime, fustat) ~ rt[,i], data = rt)
	coxSummary = summary(cox)
	coxP=coxSummary$coefficients[,"Pr(>|z|)"]
	if(coxP<coxPfilter){
	sigGenes=c(sigGenes,i)
		outTab=rbind(outTab,
			cbind(id=i,
			HR=coxSummary$conf.int[,"exp(coef)"],
			HR.95L=coxSummary$conf.int[,"lower .95"],
			HR.95H=coxSummary$conf.int[,"upper .95"],
			pvalue=coxSummary$coefficients[,"Pr(>|z|)"])
			)
	}
}
write.table(outTab,file="tcga.uniCox.txt",sep="\t",row.names=F,quote=F)
uniSigExp=rt[,sigGenes]
uniSigExp=cbind(id=row.names(uniSigExp),uniSigExp)
write.table(uniSigExp,file="tcga.uniSigExp.txt",sep="\t",row.names=F,quote=F)
bioForest=function(coxFile=null,forestFile=null,forestCol=null){
	rt <- read.table(coxFile,header=T,sep="\t",row.names=1,check.names=F)
	gene <- rownames(rt)
	hr <- sprintf("%.3f",rt$"HR")
	hrLow <- sprintf("%.3f",rt$"HR.95L")
	hrHigh <- sprintf("%.3f",rt$"HR.95H")
	Hazard.ratio <- paste0(hr,"(",hrLow,"-",hrHigh,")")
	pVal <- ifelse(rt$pvalue<0.001, "<0.001", sprintf("%.3f", rt$pvalue))
	height=nrow(rt)/12.5+5
	pdf(file=forestFile, width = 7,height = height)
	n <- nrow(rt)
	nRow <- n+1
	ylim <- c(1,nRow)
	layout(matrix(c(1,2),nc=2),width=c(3,2.5))
	xlim = c(0,3)
	par(mar=c(4,2.5,2,1))
	plot(1,xlim=xlim,ylim=ylim,type="n",axes=F,xlab="",ylab="")
	text.cex=0.8
	text(0,n:1,gene,adj=0,cex=text.cex)
	text(1.5-0.5*0.2,n:1,pVal,adj=1,cex=text.cex);text(1.5-0.5*0.2,n+1,'pvalue',cex=text.cex,font=2,adj=1)
	text(3,n:1,Hazard.ratio,adj=1,cex=text.cex);text(3,n+1,'Hazard ratio',cex=text.cex,font=2,adj=1,)
	par(mar=c(4,1,2,1),mgp=c(2,0.5,0))
	xlim = c(0,max(as.numeric(hrLow),as.numeric(hrHigh)))
	plot(1,xlim=xlim,ylim=ylim,type="n",axes=F,ylab="",xaxs="i",xlab="Hazard ratio")
	arrows(as.numeric(hrLow),n:1,as.numeric(hrHigh),n:1,angle=90,code=3,length=0.05,col="darkblue",lwd=2.5)
	abline(v=1,col="black",lty=2,lwd=2)
	boxcolor = ifelse(as.numeric(hr) > 1, forestCol[1], forestCol[2])
	points(as.numeric(hr), n:1, pch = 15, col = boxcolor, cex=1.6)
	axis(1)
	dev.off()
}
bioForest(coxFile="tcga.uniCox.txt",forestFile="forest.pdf",forestCol=c("red","green"))
library("glmnet")
library("survival")
coxSigFile="tcga.uniSigExp.txt"
geoFile="geo.expTime.txt"
setwd("G:\\")
rt=read.table(coxSigFile, header=T, sep="\t", check.names=F, row.names=1)
geo=read.table(geoFile, header=T, sep="\t", check.names=F, row.names=1)
sameGene=intersect(colnames(rt)[3:ncol(rt)], colnames(geo)[3:ncol(geo)])
rt=rt[,c("futime","fustat",sameGene)]
rt$futime[rt$futime<=0]=0.003
x=as.matrix(rt[,c(3:ncol(rt))])
y=data.matrix(Surv(rt$futime, rt$fustat))
fit=glmnet(x, y, family="cox", maxit=2000)
pdf("lasso.lambda.pdf")
plot(fit, xvar = "lambda", label = TRUE)
dev.off()
cvfit=cv.glmnet(x, y, family="cox", maxit=1000)
pdf("lasso.cvfit.pdf")
plot(cvfit)
abline(v=log(c(cvfit$lambda.min,cvfit$lambda.1se)),lty="dashed")
dev.off()
coef=coef(fit, s=cvfit$lambda.min)
index=which(coef != 0)
actCoef=coef[index]
lassoGene=row.names(coef)[index]
geneCoef=cbind(Gene=lassoGene, Coef=actCoef)
write.table(geneCoef, file="lasso.geneCoef.txt", sep="\t", quote=F, row.names=F)
trainFinalGeneExp=rt[,lassoGene]
myFun=function(x){crossprod(as.numeric(x),actCoef)}
trainScore=apply(trainFinalGeneExp,1,myFun)
outCol=c("futime","fustat",lassoGene)
risk=as.vector(ifelse(trainScore>median(trainScore),"high","low"))
outTab=cbind(rt[,outCol],riskScore=as.vector(trainScore),risk)
write.table(cbind(id=rownames(outTab),outTab),file="trainRisk.txt",sep="\t",quote=F,row.names=F)
rt=read.table(geoFile, header=T, sep="\t", check.names=F, row.names=1)
rt$futime=rt$futime/365
testFinalGeneExp=rt[,lassoGene]
testScore=apply(testFinalGeneExp,1,myFun)
outCol=c("futime","fustat",lassoGene)
risk=as.vector(ifelse(testScore>median(trainScore),"high","low"))
outTab=cbind(rt[,outCol],riskScore=as.vector(testScore),risk)
write.table(cbind(id=rownames(outTab),outTab),file="testRisk.txt",sep="\t",quote=F,row.names=F)
library(survival)
library(survminer)
library(timeROC)
setwd("G:\\")
bioROC=function(inputFile=null, rocFile=null){
	rt=read.table(inputFile, header=T, sep="\t", check.names=F)
	ROC_rt=timeROC(T=rt$futime, delta=rt$fustat,
	marker=rt$riskScore, cause=1,
	weighting='aalen',
	times=c(1,3,5), ROC=TRUE)
	pdf(file=rocFile,width=5,height=5)
	plot(ROC_rt,time=1,col='green',title=FALSE,lwd=2)
	plot(ROC_rt,time=3,col='blue',add=TRUE,title=FALSE,lwd=2)
	plot(ROC_rt,time=5,col='red',add=TRUE,title=FALSE,lwd=2)
	legend('bottomright',
	c(paste0('AUC at 1 years: ',sprintf("%.03f",ROC_rt$AUC[1])),
	paste0('AUC at 3 years: ',sprintf("%.03f",ROC_rt$AUC[2])),
	paste0('AUC at 5 years: ',sprintf("%.03f",ROC_rt$AUC[3]))),
	col=c("green","blue","red"),lwd=2,bty = 'n')
	dev.off()
}
bioROC(inputFile="trainRisk.txt", rocFile="train.ROC.pdf")
bioROC(inputFile="testRisk.txt", rocFile="test.ROC.pdf")
library(pheatmap)
setwd("G:\\")
bioRiskPlot=function(inputFile=null, riskScoreFile=null, survStatFile=null){
	rt=read.table(inputFile, header=T, sep="\t", check.names=F, row.names=1)
	rt$riskScore[rt$riskScore>quantile(rt$riskScore,0.99)]=quantile(rt$riskScore,0.99)
	rt$risk=factor(rt$risk, levels=c("low", "high"))
	rt=rt[order(rt$riskScore),]
	riskClass=rt[,"risk"]
	lowLength=length(riskClass[riskClass=="low"])
	highLength=length(riskClass[riskClass=="high"])
	lowMax=max(rt$riskScore[riskClass=="low"])
	line=rt[,"riskScore"]
	pdf(file=riskScoreFile, width=6, height=5)
	plot(line, type="p", pch=20,
		xlab="Patients (increasing risk socre)", ylab="Risk score",
		col=c(rep("blue",lowLength),rep("red",highLength)) )
	abline(h=lowMax,v=lowLength,lty=2)
	legend("topleft", c("High risk", "Low Risk"),bty="n",pch=19,col=c("red","blue"),cex=1.2)
	dev.off()
	color=as.vector(rt$fustat)
	color[color==1]="red"
	color[color==0]="blue"
	pdf(file=survStatFile, width=6, height=5)
	plot(rt$futime, pch=19,
		xlab="Patients (increasing risk socre)", ylab="Survival time (years)",
		col=color)
	legend("topleft", c("Dead", "Alive"),bty="n",pch=19,col=c("red","blue"),cex=1.2)
	abline(v=lowLength,lty=2)
	dev.off()
}
bioRiskPlot(inputFile="trainRisk.txt",
riskScoreFile="train.riskScore.pdf",
survStatFile="train.survStat.pdf")
bioRiskPlot(inputFile="testRisk.txt",
riskScoreFile="test.riskScore.pdf",
survStatFile="test.survStat.pdf")
library(Rtsne)
library(ggplot2)
setwd("G:\\")
bioPCA=function(inputFile=null, pcaFile=null, tsneFile=null){
	rt=read.table(inputFile, header=T, sep="\t", check.names=F, row.names=1)
	data=rt[c(3:(ncol(rt)-2))]
	risk=rt[,"risk"]
	data.pca=prcomp(data, scale. = TRUE)
	pcaPredict=predict(data.pca)
	PCA = data.frame(PC1 = pcaPredict[,1], PC2 = pcaPredict[,2],risk=risk)
	pdf(file=pcaFile, height=4.5, width=5.5)
	p=ggplot(data = PCA, aes(PC1, PC2)) + geom_point(aes(color = risk)) +
		scale_colour_manual(name="Risk", values =c("red", "blue"))+
	theme_bw()+
	theme(plot.margin=unit(rep(1.5,4),'lines'))+
	theme(panel.grid.major = element_blank(), panel.grid.minor = element_blank())
	print(p)
	dev.off()
	tsneOut=Rtsne(data, dims=2, perplexity=10, verbose=F, max_iter=500,check_duplicates=F)
	tsne=data.frame(tSNE1 = tsneOut$Y[,1], tSNE2 = tsneOut$Y[,2],risk=risk)
	pdf(file=tsneFile, height=4.5, width=5.5)
	p=ggplot(data = tsne, aes(tSNE1, tSNE2)) + geom_point(aes(color = risk)) +
		scale_colour_manual(name="Risk", values =c("red", "blue"))+
	theme_bw()+
	theme(plot.margin=unit(rep(1.5,4),'lines'))+
	theme(panel.grid.major = element_blank(), panel.grid.minor = element_blank())
	print(p)
	dev.off()
}
bioPCA(inputFile="trainRisk.txt", pcaFile="train.PCA.pdf", tsneFile="train.t-SNE.pdf")
bioPCA(inputFile="testRisk.txt", pcaFile="test.PCA.pdf", tsneFile="test.t-SNE.pdf")
library(survival)
setwd("G:\\")
bioForest=function(coxFile=null, forestFile=null, forestCol=null){
	rt <- read.table(coxFile,header=T,sep="\t",row.names=1,check.names=F)
	gene <- rownames(rt)
	hr <- sprintf("%.3f",rt$"HR")
	hrLow <- sprintf("%.3f",rt$"HR.95L")
	hrLow[hrLow<0.001]=0.001
	hrHigh <- sprintf("%.3f",rt$"HR.95H")
	Hazard.ratio <- paste0(hr,"(",hrLow,"-",hrHigh,")")
	pVal <- ifelse(rt$pvalue<0.001, "<0.001", sprintf("%.3f", rt$pvalue))
	pdf(file=forestFile, width=6.5, height=4.8)
	n <- nrow(rt)
	nRow <- n+1
	ylim <- c(1,nRow)
	layout(matrix(c(1,2),nc=2),width=c(3,2.5))
	xlim = c(0,3)
	par(mar=c(4,2.5,2,1))
	plot(1,xlim=xlim,ylim=ylim,type="n",axes=F,xlab="",ylab="")
	text.cex=0.8
	text(0,n:1,gene,adj=0,cex=text.cex)
	text(1.5-0.5*0.2,n:1,pVal,adj=1,cex=text.cex);text(1.5-0.5*0.2,n+1,'pvalue',cex=text.cex,adj=1)
	text(3,n:1,Hazard.ratio,adj=1,cex=text.cex);text(3,n+1,'Hazard ratio',cex=text.cex,adj=1,)
	par(mar=c(4,1,2,1),mgp=c(2,0.5,0))
	LOGindex=2
	hrLow = log(as.numeric(hrLow),LOGindex)
	hrHigh = log(as.numeric(hrHigh),LOGindex)
	hr = log(as.numeric(hr),LOGindex)
	xlim = c(floor(min(hrLow,hrHigh)),ceiling(max(hrLow,hrHigh)))
	plot(1,xlim=xlim,ylim=ylim,type="n",axes=F,ylab="",xaxs="i",xlab="Hazard ratio")
	arrows(as.numeric(hrLow),n:1,as.numeric(hrHigh),n:1,angle=90,code=3,length=0.05,col="darkblue",lwd=2.5)
	abline(v=log(1,LOGindex),col="black",lty=2,lwd=2)
	boxcolor = ifelse(as.numeric(hr) > log(1,LOGindex), forestCol, forestCol)
	points(as.numeric(hr), n:1, pch = 15, col = boxcolor, cex=2)
	a1 = axis(1,labels=F,tick=F)
	axis(1,a1,LOGindex^a1)
	dev.off()
}
indep=function(riskFile=null,cliFile=null,uniOutFile=null,multiOutFile=null,uniForest=null,multiForest=null){
	risk=read.table(riskFile, header=T, sep="\t", check.names=F, row.names=1) #Â¶ÃÃˆÂ¡Â·Ã§ÃÃ•ÃŽÃ„Â¼Ã¾
	cli=read.table(cliFile, header=T, sep="\t", check.names=F, row.names=1) #Â¶ÃÃˆÂ¡ÃÃ™Â´Â²ÃŽÃ„Â¼Ã¾
	sameSample=intersect(row.names(cli),row.names(risk))
	risk=risk[sameSample,]
	cli=cli[sameSample,]
	rt=cbind(futime=risk[,1], fustat=risk[,2], cli, riskScore=risk[,(ncol(risk)-1)])
	uniTab=data.frame()
	for(i in colnames(rt[,3:ncol(rt)])){
		cox <- coxph(Surv(futime, fustat) ~ rt[,i], data = rt)
		coxSummary = summary(cox)
		uniTab=rbind(uniTab,
		cbind(id=i,
		HR=coxSummary$conf.int[,"exp(coef)"],
		HR.95L=coxSummary$conf.int[,"lower .95"],
		HR.95H=coxSummary$conf.int[,"upper .95"],
		pvalue=coxSummary$coefficients[,"Pr(>|z|)"])
		)
	}
	write.table(uniTab,file=uniOutFile,sep="\t",row.names=F,quote=F)
	bioForest(coxFile=uniOutFile, forestFile=uniForest, forestCol="green")
	uniTab=uniTab[as.numeric(uniTab[,"pvalue"])<0.05,]
	rt1=rt[,c("futime", "fustat", as.vector(uniTab[,"id"]))]
	multiCox=coxph(Surv(futime, fustat) ~ ., data = rt1)
	multiCoxSum=summary(multiCox)
	multiTab=data.frame()
	multiTab=cbind(
	HR=multiCoxSum$conf.int[,"exp(coef)"],
	HR.95L=multiCoxSum$conf.int[,"lower .95"],
	HR.95H=multiCoxSum$conf.int[,"upper .95"],
	pvalue=multiCoxSum$coefficients[,"Pr(>|z|)"])
	multiTab=cbind(id=row.names(multiTab),multiTab)
	write.table(multiTab,file=multiOutFile,sep="\t",row.names=F,quote=F)
	bioForest(coxFile=multiOutFile, forestFile=multiForest, forestCol="red")
}
indep(riskFile="trainRisk.txt",
cliFile="clinical.txt",
uniOutFile="uniCox.txt",
multiOutFile="multiCox.txt",
uniForest="uniForest.pdf",
multiForest="multiForest.pdf")
library(survival)
library(regplot)
library(rms)
riskFile="risk.TCGAall.txt"
cliFile="clinical.txt"
setwd("G:\\")
risk=read.table(riskFile, header=T, sep="\t", check.names=F, row.names=1)
cli=read.table(cliFile, header=T, sep="\t", check.names=F, row.names=1)
cli=cli[apply(cli,1,function(x)any(is.na(match('unknow',x)))),,drop=F]
cli$Age=as.numeric(cli$Age)
samSample=intersect(row.names(risk), row.names(cli))
risk1=risk[samSample,,drop=F]
cli=cli[samSample,,drop=F]
rt=cbind(risk1[,c("futime", "fustat", "Risk")], cli)
res.cox=coxph(Surv(futime, fustat) ~ . , data = rt)
nom1=regplot(res.cox,
plots = c("density", "boxes"),
clickable=F,
title="",
points=TRUE,
droplines=TRUE,
observation=rt[1,],
rank="sd",
failtime = c(1,3,5),
prfail = F)
nomoRisk=predict(res.cox, data=rt, type="risk")
rt=cbind(risk1, Nomogram=nomoRisk)
outTab=rbind(ID=colnames(rt), rt)
write.table(outTab, file="nomoRisk.txt", sep="\t", col.names=F, quote=F)
pdf(file="calibration.pdf", width=5, height=5)
f <- cph(Surv(futime, fustat) ~ Nomogram, x=T, y=T, surv=T, data=rt, time.inc=1)
cal <- calibrate(f, cmethod="KM", method="boot", u=1, m=(nrow(rt)/3), B=1000)
plot(cal, xlim=c(0,1), ylim=c(0,1),
	xlab="Nomogram-predicted OS (%)", ylab="Observed OS (%)", lwd=1.5, col="green", sub=F)
f <- cph(Surv(futime, fustat) ~ Nomogram, x=T, y=T, surv=T, data=rt, time.inc=3)
cal <- calibrate(f, cmethod="KM", method="boot", u=3, m=(nrow(rt)/3), B=1000)
plot(cal, xlim=c(0,1), ylim=c(0,1), xlab="", ylab="", lwd=1.5, col="blue", sub=F, add=T)
f <- cph(Surv(futime, fustat) ~ Nomogram, x=T, y=T, surv=T, data=rt, time.inc=5)
cal <- calibrate(f, cmethod="KM", method="boot", u=5, m=(nrow(rt)/3), B=1000)
plot(cal, xlim=c(0,1), ylim=c(0,1), xlab="", ylab="", lwd=1.5, col="red", sub=F, add=T)
legend('bottomright', c('1-year', '3-year', '5-year'),
	col=c("green","blue","red"), lwd=1.5, bty = 'n')
dev.off()
library(survival)
library(survminer)
library(timeROC)
library(ggDCA)
predictTime=1
riskFile="nomoRisk.txt"
cliFile="clinical.txt"
setwd("")
risk=read.table(riskFile, header=T, sep="\t", check.names=F, row.names=1)
cli=read.table(cliFile, header=T, sep="\t", check.names=F, row.names=1)
samSample=intersect(row.names(risk), row.names(cli))
risk1=risk[samSample,,drop=F]
cli1=cli[samSample,,drop=F]
data=cbind(risk1, cli1)
rt=cbind(risk1[,c("futime","fustat","Risk","Nomogram")], cli1)
rt[,"Age"]=ifelse(rt[,"Age"]>65, 1, 0)
rt[,"Nomogram"]=ifelse(rt[,"Nomogram"]>median(rt[,"Nomogram"]), 1, 0)
Nomogram<-coxph(Surv(futime,fustat)~Nomogram,rt)
Risk<-coxph(Surv(futime,fustat)~Risk,rt)
Age<-coxph(Surv(futime,fustat)~Age,rt)
Gender<-coxph(Surv(futime,fustat)~Gender,rt)
Grade<-coxph(Surv(futime,fustat)~Grade,rt)
Stage<-coxph(Surv(futime,fustat)~Stage,rt)
pdf(file="DCA.pdf", width=6.5, height=5.2)
d_train=dca(Nomogram,Risk,Age,Gender,Grade,Stage, times=predictTime)
ggplot(d_train, linetype=1)
dev.off()
rt=cbind(risk1[,c("futime","fustat","riskScore","Nomogram")], cli1)
aucText=c()
bioCol=rainbow(ncol(rt)-1, s=0.9, v=0.9)
pdf(file="cliROC.pdf", width=6, height=6)
i=3
ROC_rt=timeROC(T=risk$futime,
delta=risk$fustat,
marker=risk$riskScore, cause=1,
weighting='aalen',
times=c(predictTime),ROC=TRUE)
plot(ROC_rt, time=predictTime, col=bioCol[i-2], title=FALSE, lwd=2)
aucText=c(paste0("Risk", ", AUC=", sprintf("%.3f",ROC_rt$AUC[2])))
abline(0,1)
for(i in 4:ncol(rt)){
	ROC_rt=timeROC(T=rt$futime,
				delta=rt$fustat,
				marker=rt[,i], cause=1,
				weighting='aalen',
				times=c(predictTime),ROC=TRUE)
	plot(ROC_rt, time=predictTime, col=bioCol[i-2], title=FALSE, lwd=2, add=TRUE)
	aucText=c(aucText, paste0(colnames(rt)[i],", AUC=",sprintf("%.3f",ROC_rt$AUC[2])))
}
legend("bottomright", aucText,lwd=2,bty="n",col=bioCol[1:(ncol(rt)-1)])
dev.off()
library(limma)
library(pheatmap)
riskFile="trainRisk.txt"
cliFile="clinical.txt"
setwd("G:\\")
cli=read.table(cliFile, header=T, sep="\t", check.names=F, row.names=1)
risk=read.table(riskFile, header=T, sep="\t", check.names=F, row.names=1)
risk$risk=factor(risk$risk, levels=c("low", "high"))
samSample=intersect(row.names(risk), row.names(cli))
cli=cli[samSample,,drop=F]
risk=risk[samSample,,drop=F]
data=cbind(risk, cli)
data=data[order(data$riskScore),,drop=F]
Type=data[,(ncol(risk):ncol(data))]
exp=data[,(3:(ncol(risk)-2))]
sigVec=c("risk")
for(clinical in colnames(Type[,2:ncol(Type)])){
	data=Type[c("risk", clinical)]
	colnames(data)=c("risk", "clinical")
	data=data[(data[,"clinical"]!="unknow"),]
	tableStat=table(data)
	stat=chisq.test(tableStat)
	pvalue=stat$p.value
	Sig=ifelse(pvalue<0.001,"***",ifelse(pvalue<0.01,"**",ifelse(pvalue<0.05,"*","")))
	sigVec=c(sigVec, paste0(clinical, Sig))
}
colnames(Type)=sigVec
colorList=list()
#Type=Type[apply(Type,1,function(x)any(is.na(match('unknow',x)))),,drop=F]
bioCol=c("#0066FF","#FF0000","#ed1299", "#0dbc21", "#246b93", "#cc8e12", "#d561dd",
"#6ad157", "#f7aa5d", "#9ed84e", "#39ba30", "#373bbf", "#a1ce4c", "#ef3bb6", "#d66551",
"#1a918f", "#ddd53e", "#ff66fc", "#2927c4", "#57e559" ,"#8e3af4" ,"#f9a270" ,"#22547f", "#db5e92",
"#4aef7b", "#e86502", "#99db27", "#e07233", "#8249aa","#cebb10", "#03827f", "#931635", "#ff523f",
"#edd05e", "#6f25e8", "#0dbc21", "#167275", "#280f7a", "#6373ed", "#5b910f" ,"#7b34c1" ,"#0cf29a" ,"#d80fc1",
"#dd27ce", "#07a301", "#391c82", "#2baeb5","#925bea", "#09f9f5", "#63ff4f")
j=0
for(cli in colnames(Type[,1:ncol(Type)])){
	cliLength=length(levels(factor(Type[,cli])))
	cliCol=bioCol[(j+1):(j+cliLength)]
	j=j+cliLength
	names(cliCol)=levels(factor(Type[,cli]))
	if("unknow" %in% levels(factor(Type[,cli]))){
		cliCol["unknow"]="grey75"}
	colorList[[cli]]=cliCol
}
pdf("heatmap.pdf", width=9, height=6)
pheatmap(t(exp),
annotation=Type,
annotation_colors = colorList,
color = colorRampPalette(c(rep("blue",3), "white", rep("red",3)))(100),
cluster_cols =F,
cluster_rows =F,
scale="row",
show_colnames=F,
show_rownames=T,
fontsize=6,
fontsize_row=7,
fontsize_col=6)
dev.off()
library("clusterProfiler")
library("org.Hs.eg.db")
library("enrichplot")
library("ggplot2")
pvalueFilter=0.05
qvalueFilter=0.05
setwd("G:\\")
rt=read.table("id.txt",sep="\t",header=T,check.names=F)
rt=rt[is.na(rt[,"entrezID"])==F,]
gene=rt$entrezID
geneFC=2^rt$logFC
names(geneFC)=gene
colorSel="qvalue"
if(qvalueFilter>0.05){
	colorSel="pvalue"
}
kk=enrichGO(gene = gene,OrgDb = org.Hs.eg.db, pvalueCutoff =1, qvalueCutoff = 1, ont="all", readable =T)
GO=as.data.frame(kk)
GO=GO[(GO$pvalue<pvalueFilter & GO$qvalue<qvalueFilter),]
write.table(GO,file="GO.txt",sep="\t",quote=F,row.names = F)
showNum=10
if(nrow(GO)<30){
	showNum=nrow(GO)
}
pdf(file="barplot.pdf",width = 9,height = 11)
bar=barplot(kk, drop = TRUE, showCategory =showNum,split="ONTOLOGY",color = colorSel) + facet_grid(ONTOLOGY~., scale='free')
print(bar)
dev.off()
pdf(file="bubble.pdf",width = 9,height = 11)
bub=dotplot(kk,showCategory = showNum, orderBy = "GeneRatio",split="ONTOLOGY", color = colorSel) + facet_grid(ONTOLOGY~., scale='free')
print(bub)
dev.off()
pdf(file="circos.pdf",width = 9,height = 7)
cnet=cnetplot(kk, foldChange=geneFC, showCategory = 5, circular = TRUE, colorEdge = TRUE)
print(cnet)
dev.off()
library(limma)
library(org.Hs.eg.db)
library(clusterProfiler)
library(enrichplot)
expFile="symbol.txt"
riskFile="risk.TCGAall.txt"
gmtFile="c2.cp.kegg.v7.4.symbols.gmt"
setwd("G:\\")
rt=read.table(expFile, header=T, sep="\t", check.names=F)
rt=as.matrix(rt)
rownames(rt)=rt[,1]
exp=rt[,2:ncol(rt)]
dimnames=list(rownames(exp),colnames(exp))
data=matrix(as.numeric(as.matrix(exp)),nrow=nrow(exp),dimnames=dimnames)
data=avereps(data)
data=data[rowMeans(data)>0.5,]
group=sapply(strsplit(colnames(data),"\\-"), "[", 4)
group=sapply(strsplit(group,""), "[", 1)
group=gsub("2", "1", group)
data=data[,group==0]
data=t(data)
rownames(data)=gsub("(.*?)\\-(.*?)\\-(.*?)\\-.*", "\\1\\-\\2\\-\\3", rownames(data))
data=t(avereps(data))
Risk=read.table(riskFile, header=T, sep="\t", check.names=F, row.names=1)
data=data[,row.names(Risk)]
dataL=data[,row.names(Risk[Risk[,"Risk"]=="low",])]
dataH=data[,row.names(Risk[Risk[,"Risk"]=="high",])]
meanL=rowMeans(dataL)
meanH=rowMeans(dataH)
meanL[meanL<0.00001]=0.00001
meanH[meanH<0.00001]=0.00001
logFC=log2(meanH)-log2(meanL)
logFC=sort(logFC,decreasing=T)
genes=names(logFC)
gmt=read.gmt(gmtFile)
kk=GSEA(logFC, TERM2GENE=gmt, pvalueCutoff = 1)
kkTab=as.data.frame(kk)
kkTab=kkTab[kkTab$pvalue<0.05,]
write.table(kkTab,file="GSEA.result.txt",sep="\t",quote=F,row.names = F)
termNum=5
kkUp=kkTab[kkTab$NES>0,]
if(nrow(kkUp)>=termNum){
	showTerm=row.names(kkUp)[1:termNum]
	gseaplot=gseaplot2(kk, showTerm, base_size=8, title="Enriched in high risk group")
	pdf(file="GSEA.highRisk.pdf", width=7, height=5.5)
	print(gseaplot)
	dev.off()
}
termNum=5
kkDown=kkTab[kkTab$NES<0,]
if(nrow(kkDown)>=termNum){
	showTerm=row.names(kkDown)[1:termNum]
	gseaplot=gseaplot2(kk, showTerm, base_size=8, title="Enriched in low risk group")
	pdf(file="GSEA.lowRisk.pdf", width=7, height=5.5)
	print(gseaplot)
	dev.off()
}
library(limma)
library(GSEABase)
library(GSVA)
library(pheatmap)
expFile="symbol.txt"
riskFile="risk.TCGA.txt"
gmtFile="c2.cp.kegg.v7.4.symbols.gmt"
setwd("G:\\")
rt=read.table(expFile, header=T, sep="\t", check.names=F)
rt=as.matrix(rt)
rownames(rt)=rt[,1]
exp=rt[,2:ncol(rt)]
dimnames=list(rownames(exp), colnames(exp))
data=matrix(as.numeric(as.matrix(exp)), nrow=nrow(exp), dimnames=dimnames)
data=avereps(data)
geneSets=getGmt(gmtFile, geneIdType=SymbolIdentifier())
gsvaResult=gsva(data,
geneSets,
min.sz=10,
max.sz=500,
verbose=TRUE,
parallel.sz=1)
data=t(gsvaResult)
group=sapply(strsplit(row.names(data),"\\-"), "[", 4)
group=sapply(strsplit(group,""), "[", 1)
group=gsub("2", "1", group)
data=data[group==0,]
row.names(data)=gsub("(.*?)\\-(.*?)\\-(.*?)\\-(.*?)\\-.*", "\\1\\-\\2\\-\\3", row.names(data))
data=avereps(data)
risk=read.table(riskFile, header=T, sep="\t", check.names=F, row.names=1)
sameSample=intersect(row.names(data), row.names(risk))
data=data[sameSample,,drop=F]
risk=risk[sameSample,"Risk",drop=F]
gsvarisk=cbind(data, risk)
con=gsvarisk[gsvarisk$Risk=="low",]
treat=gsvarisk[gsvarisk$Risk=="high",]
data=rbind(con, treat)
Type=as.vector(data$Risk)
Type=factor(Type, levels=c("low", "high"))
ann=data[,ncol(data),drop=F]
data=t(data[,-ncol(data),drop=F])
design=model.matrix(~0+factor(Type))
colnames(design)=levels(factor(Type))
fit=lmFit(data, design)
cont.matrix=makeContrasts(high-low, levels=design)
fit2=contrasts.fit(fit, cont.matrix)
fit2=eBayes(fit2)
allDiff=topTable(fit2,adjust='fdr',number=200000)
allDiffOut=rbind(id=colnames(allDiff),allDiff)
write.table(allDiffOut, file="all.txt", sep="\t", quote=F, col.names=F)
diffSig=allDiff[with(allDiff, (abs(logFC)>0.1 & adj.P.Val < 0.05)), ]
diffSigOut=rbind(id=colnames(diffSig), diffSig)
write.table(diffSigOut, file="diff.txt", sep="\t", quote=F, col.names=F)
ann_colors=list()
bioCol=c("blue", "red")
names(bioCol)=c("low", "high")
ann_colors[["Risk"]]=bioCol
termNum=50
diffTermName=as.vector(rownames(diffSig))
diffLength=length(diffTermName)
if(diffLength<termNum){termNum=diffLength}
hmGene=diffTermName[1:termNum]
hmExp=data[hmGene,]
pdf(file="heatmap.pdf", width=10, height=6)
pheatmap(hmExp,
	annotation=ann,
	annotation_colors = ann_colors,
	color = colorRampPalette(c(rep("blue",3), "white", rep("red",3)))(50),
	cluster_cols=F,
	show_colnames = F,
	gaps_col=as.vector(cumsum(table(Type))),
	scale="row",
	fontsize = 7,
	fontsize_row=6,
	fontsize_col=7)
dev.off()
library(limma)
library(pheatmap)
riskFile="risk.txt"
immFile="infiltration_estimation_for_tcga.csv"
setwd("G:\\")
risk=read.table(riskFile, header=T, sep="\t", check.names=F, row.names=1)
risk$riskScore[risk$riskScore>quantile(risk$riskScore,0.99)]=quantile(risk$riskScore,0.99)
immune=read.csv(immFile, header=T, sep=",", check.names=F, row.names=1)
immune=as.matrix(immune)
rownames(immune)=gsub("(.*?)\\-(.*?)\\-(.*?)\\-(.*)", "\\1\\-\\2\\-\\3", rownames(immune))
immune=avereps(immune)
sameSample=intersect(row.names(risk), row.names(immune))
risk=risk[sameSample, c("risk", "riskScore")]
immune=immune[sameSample,]
data=cbind(risk, immune)
outTab=data.frame()
sigCell=c("risk","riskScore")
for(i in colnames(data)[3:ncol(data)]){
	if(sd(data[,i])<0.001){next}
	wilcoxTest=wilcox.test(data[,i] ~ data[,"risk"])
	pvalue=wilcoxTest$p.value
	if(wilcoxTest$p.value<0.05){
		outTab=rbind(outTab,cbind(immune=i, pvalue))
		sigCell=c(sigCell, i)
	}
}
write.table(file="immuneCor.txt", outTab, sep="\t", quote=F, row.names=F)
data=data[,sigCell]
data=data[order(data[,"riskScore"]),]
annCol=data[,1:2]
annCol[,"risk"]=factor(annCol[,"risk"], unique(annCol[,"risk"]))
data=t(data[,(3:ncol(data))])
annRow=sapply(strsplit(rownames(data),"_"), '[', 2)
annRow=as.data.frame(annRow)
row.names(annRow)=row.names(data)
colnames(annRow)=c("Methods")
annRow[,"Methods"]=factor(annRow[,"Methods"], unique(annRow[,"Methods"]))
gapCol=as.vector(cumsum(table(annCol[,"risk"])))
gapRow=as.vector(cumsum(table(annRow[,"Methods"])))
risk=c("blue", "red")
names(risk)=c("low", "high")
ann_colors=list(risk=risk)
pdf("immHeatmap.pdf", width=9, height=6)
pheatmap(data,
annotation=annCol,
annotation_row=annRow,
annotation_colors = ann_colors,
color = colorRampPalette(c(rep("blue",5), "white", rep("red",5)))(100),
cluster_cols =F,
cluster_rows =F,
gaps_row=gapRow,
gaps_col=gapCol,
scale="row",
show_colnames=F,
show_rownames=T,
fontsize=6,
fontsize_row=5,
fontsize_col=6)
dev.off()
library(limma)
library(reshape2)
library(ggpubr)
setwd("G:\\")
scoreCor=function(riskFile=null, scoreFile=null, project=null){
	data=read.table(scoreFile, header=T, sep="\t", check.names=F, row.names=1)
	data=t(data)
	risk=read.table(riskFile, header=T, sep="\t", check.names=F, row.names=1)
	sameSample=intersect(row.names(data),row.names(risk))
	data=data[sameSample,,drop=F]
	risk=risk[sameSample,,drop=F]
	rt=cbind(data,risk[,c("riskScore","risk")])
	rt=rt[,-(ncol(rt)-1)]
	immCell=c("aDCs","B_cells","CD8+_T_cells","DCs","iDCs","Macrophages",
	"Mast_cells","Neutrophils","NK_cells","pDCs","T_helper_cells",
	"Tfh","Th1_cells","Th2_cells","TIL","Treg")
	rt1=rt[,c(immCell,"risk")]
	data=melt(rt1,id.vars=c("risk"))
	colnames(data)=c("Risk","Type","Score")
	data$Risk=factor(data$Risk, levels=c("low","high"))
	p=ggboxplot(data, x="Type", y="Score", color = "Risk",
		xlab="",ylab="Score",add = "none",palette = c("blue","red") )
	p=p+rotate_x_text(50)
	p=p+stat_compare_means(aes(group=Risk),symnum.args=list(cutpoints = c(0, 0.001, 0.01, 0.05, 1), symbols = c("***", "**", "*", "")),label = "p.signif")
	pdf(file=paste0(project,".immCell.pdf"), width=7, height=6)
	print(p)
	dev.off()
	immFunction=c("APC_co_inhibition","APC_co_stimulation","CCR",
	"Check-point","Cytolytic_activity","HLA","Inflammation-promoting",
	"MHC_class_I","Parainflammation","T_cell_co-inhibition",
	"T_cell_co-stimulation","Type_I_IFN_Reponse","Type_II_IFN_Reponse")
	rt1=rt[,c(immFunction,"risk")]
	data=melt(rt1,id.vars=c("risk"))
	colnames(data)=c("Risk","Type","Score")
	data$Risk=factor(data$Risk, levels=c("low","high"))
	p=ggboxplot(data, x="Type", y="Score", color = "Risk",
		xlab="",ylab="Score",add = "none",palette = c("blue","red") )
	p=p+rotate_x_text(50)
	p=p+stat_compare_means(aes(group=Risk),symnum.args=list(cutpoints = c(0, 0.001, 0.01, 0.05, 1), symbols = c("***", "**", "*", "")),label = "p.signif")
	pdf(file=paste0(project,".immFunction.pdf"), width=7, height=6)
	print(p)
	dev.off()
}
scoreCor(riskFile="trainRisk.txt", scoreFile="TCGA.score.txt", project="TCGA")
scoreCor(riskFile="testRisk.txt", scoreFile="GEO.score.txt", project="GEO")
library(survival)
library(survminer)
setwd("G:\\")
risk=read.table("risk.txt",header=T,sep="\t",check.names=F,row.names=1)
cli=read.table("clinical.txt",sep="\t",check.names=F,header=T,row.names=1)
sameSample=intersect(row.names(cli),row.names(risk))
risk=risk[sameSample,]
cli=cli[sameSample,]
data=cbind(futime=risk[,1],fustat=risk[,2],cli,risk=risk[,"risk"])
for(i in colnames(data[,3:(ncol(data)-1)])){
rt=data[,c("futime","fustat",i,"risk")]
rt=rt[(rt[,i]!="unknow"),]
colnames(rt)=c("futime","fustat","clinical","risk")
	tab=table(rt[,"clinical"])
	tab=tab[tab!=0]
	for(j in names(tab)){
		rt1=rt[(rt[,"clinical"]==j),]
		tab1=table(rt1[,"risk"])
		tab1=tab1[tab1!=0]
		labels=paste0(names(tab1)," risk(n=",tab1,")")
		if(length(labels)==2){
			titleName=j
			if((i=="age") | (i=="Age") | (i=="AGE")){
				titleName=paste0("age",j)
			}
			diff=survdiff(Surv(futime, fustat) ~risk,data = rt1)
			pValue=1-pchisq(diff$chisq,df=1)
			if(pValue<0.001){
				pValue="p<0.001"
			}else{
				pValue=paste0("p=",sprintf("%.03f",pValue))
			}
			fit <- survfit(Surv(futime, fustat) ~ risk, data = rt1)
			surPlot=ggsurvplot(fit,
			data=rt1,
			pval=pValue,
			pval.size=6,
			legend.labs=labels,
			legend.title=titleName,
			font.legend=13,
			xlab="Time(years)",
			break.time.by = 1,
			palette=c("red","blue") )
		j=gsub(">=","ge",j);j=gsub("<=","le",j);j=gsub(">","gt",j);j=gsub("<","lt",j)
			pdf(file=paste0("survival.",i,"_",j,".pdf"),onefile = FALSE,
			width = 5,
			height =4.5)
			print(surPlot)
			dev.off()
		}
	}
}
library(limma)
library(ggpubr)
library(pRRophetic)
library(ggplot2)
set.seed(12345)
pFilter=0.001
expFile="symbol.txt"
riskFile="risk.TCGA.txt"
setwd("G:\\A")
data(cgp2016ExprRma)
data(PANCANCER_IC_Tue_Aug_9_15_28_57_2016)
allDrugs=unique(drugData2016$Drug.name)
rt = read.table(expFile, header=T, sep="\t", check.names=F)
rt=as.matrix(rt)
rownames(rt)=rt[,1]
exp=rt[,2:ncol(rt)]
dimnames=list(rownames(exp),colnames(exp))
data=matrix(as.numeric(as.matrix(exp)),nrow=nrow(exp),dimnames=dimnames)
data=avereps(data)
data=data[rowMeans(data)>0.5,]
group=sapply(strsplit(colnames(data),"\\-"), "[", 4)
group=sapply(strsplit(group,""), "[", 1)
group=gsub("2","1",group)
data=data[,group==0]
data=t(data)
rownames(data)=gsub("(.*?)\\-(.*?)\\-(.*?)\\-(.*)", "\\1\\-\\2\\-\\3", rownames(data))
data=avereps(data)
data=t(data)
riskRT=read.table(riskFile, header=T, sep="\t", check.names=F, row.names=1)
riskRT$riskScore[riskRT$riskScore>quantile(riskRT$riskScore,0.99)]=quantile(riskRT$riskScore,0.99)
for(drug in allDrugs){
	possibleError=tryCatch(
	{senstivity=pRRopheticPredict(data, drug, selection=1, dataset = "cgp2016")},
	error=function(e) e)
if(inherits(possibleError, "error")){next}
	senstivity=senstivity[senstivity!="NaN"]
	senstivity[senstivity>quantile(senstivity,0.99)]=quantile(senstivity,0.99)
	sameSample=intersect(row.names(riskRT), names(senstivity))
	risk=riskRT[sameSample, c("riskScore","Risk"),drop=F]
	senstivity=senstivity[sameSample]
	rt=cbind(risk, senstivity)
	rt$Risk=factor(rt$Risk, levels=c("low", "high"))
	type=levels(factor(rt[,"Risk"]))
	comp=combn(type, 2)
	my_comparisons=list()
	for(i in 1:ncol(comp)){my_comparisons[[i]]<-comp[,i]}
	test=wilcox.test(senstivity~Risk, data=rt)
	diffPvalue=test$p.value
	x=as.numeric(rt[,"riskScore"])
	y=as.numeric(rt[,"senstivity"])
	corT=cor.test(x, y, method="spearman")
	corPvalue=corT$p.value
	if((diffPvalue<pFilter) & (corPvalue<pFilter)){
		boxplot=ggboxplot(rt, x="Risk", y="senstivity", fill="Risk",
					xlab="Risk",
					ylab=paste0(drug, " senstivity (IC50)"),
					legend.title="Risk",
					palette=c("#0066FF","#FF0000")
					)+
			stat_compare_means(comparisons=my_comparisons)
		pdf(file=paste0("durgSenstivity.", drug, ".pdf"), width=5, height=4.5)
		print(boxplot)
		dev.off()
		df1=as.data.frame(cbind(x,y))
		p1=ggplot(df1, aes(x, y)) +
				xlab("Risk score") + ylab(paste0(drug, " senstivity (IC50)"))+
				geom_point() + geom_smooth(method="lm",formula = y ~ x) + theme_bw()+
				stat_cor(method = 'spearman', aes(x =x, y =y))
		pdf(file=paste0("Cor.", drug, ".pdf"), width=5, height=4.6)
		print(p1)
		dev.off()
	}
}
library(limma)
library(ggpubr)
riskFile="risk.IMvigor.txt"
cliFile="clinical.txt"
setwd("G:\\")
risk=read.table(riskFile, header=T, sep="\t", check.names=F, row.names=1)
risk$riskScore[risk$riskScore>quantile(risk$riskScore,0.99)]=quantile(risk$riskScore,0.99)
cli=read.table(cliFile, header=T, sep="\t", check.names=F, row.names=1)
samSample=intersect(row.names(risk), row.names(cli))
risk=risk[samSample,"riskScore",drop=F]
cli=cli[samSample,,drop=F]
rt=cbind(risk, cli)
for(clinical in colnames(rt)[2:ncol(rt)]){
	data=rt[c("riskScore", clinical)]
	colnames(data)=c("riskScore", "clinical")
	data=data[(data[,"clinical"]!="unknow"),]
	group=levels(factor(data$clinical))
	data$clinical=factor(data$clinical, levels=group)
	comp=combn(group,2)
	my_comparisons=list()
	for(i in 1:ncol(comp)){my_comparisons[[i]]<-comp[,i]}
	boxplot=ggboxplot(data, x="clinical", y="riskScore", color="clinical",
		xlab="",
		ylab="Risk score",
		legend.title=clinical,
		add = "jitter")+
	stat_compare_means(comparisons = my_comparisons)
	#stat_compare_means(comparisons = my_comparisons,symnum.args=list(cutpoints = c(0, 0.001, 0.01, 0.05, 1), symbols = c("***", "**", "*", "ns")),label = "p.signif")
	pdf(file=paste0("cliCor.", clinical, ".pdf"), width=6, height=5)
	print(boxplot)
	dev.off()
}
